# Supplementary material for: Synthesis of Co3O4@SnO2@C core-shell nanorods with superior reversible lithium-ion storage
Source: Royal Society of Chemistry journal article supplement (doi:10.1039/c2ra21765a), 2012-01-01
Supplement: c2ra21765a.pdf [file c2ra21765a.pdf]

**Supporting Information for “Synthesis of  $\text{Co}_3\text{O}_4@\text{SnO}_2@\text{C}$   
core-shell-shell nanorods with superior reversible  
lithium-ion storage”**

Yue Qi, Hui Zhang\*, Ning Du, Chuanxin Zhai and Deren Yang

State Key Lab of Silicon Materials and Department of Materials Science and  
Engineering, Zhejiang University Hangzhou 310027, People’s Republic of China

\*Electronic mail: [meszhanghui@zju.edu.cn](mailto:meszhanghui@zju.edu.cn)

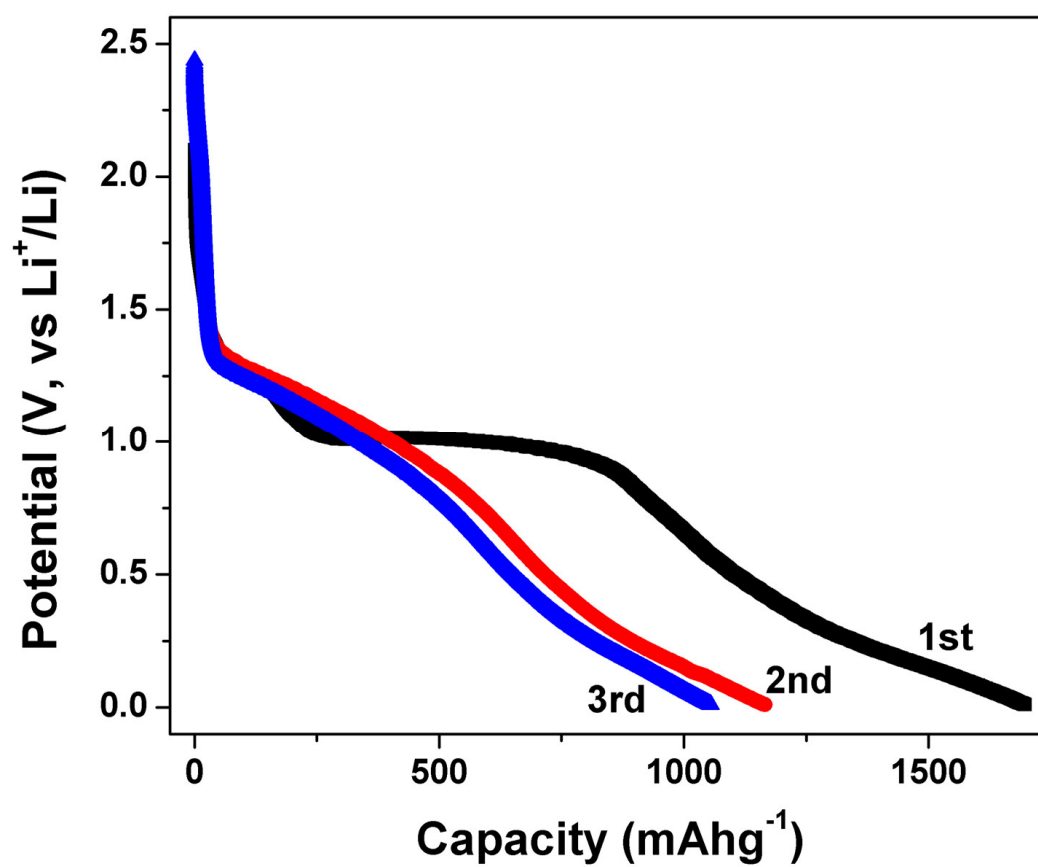

Fig. S1 The 1st, 2nd, and 3rd discharge curves of the  $\text{Co}_3\text{O}_4@\text{SnO}_2@\text{C}$  nanorods based anode material at a current density of  $200 \text{ mA g}^{-1}$  at room temperature.
